# Supplementary material
Source: publisher figshare collection journal article supplement (https://springernature.figshare.com/ndownloader/files/18614702)
Supplement: Supplementary file 1 [file 18614702]

## Sheet: Tab1
Table S1: Overview of the Test guidelines covered in this review. The Table carries information on the guideline number, the year of publication, its title, the level of testing and the systematic group assessed.
Guideline No	Date	Name	Level of testing	Systematic Groups
40CRF797.1050	2003	Algal acute toxicity test	laboratory	Algae, cyanobacteria & macrophytes
ASTM D 3978-04	2004	Algal Growth Testing with Pseudokirchneriella subcapitata	laboratory	Algae, cyanobacteria & macrophytes
ASTM E 1218-04	2004	Guide Conducting Static Toxicity Tests with Microalgae	laboratory	Algae, cyanobacteria & macrophytes
ASTM E 1415-91	1991 (reapproved 2004)	Conducting Static Toxicity Tests with Lemna gibba G3	laboratory	Algae, cyanobacteria & macrophytes
ASTM E 1841-04	2004	Conducting renewal phytotoxicity test with freshwater emergent macrophytes	laboratory	Algae, cyanobacteria & macrophytes
ASTM E 1913-04	2004	Standard Guide for Conducting Static, Axenic, 14-Day Phytotoxicity Tests in Test Tubes with the Submersed Aquatic Macrophyte, Myriophyllum sibiricum Komarov	laboratory	Algae, cyanobacteria & macrophytes
DIN 38412 Part 33	1991	Determination of the non-poisonous effect of waste water to green algae by dilution limits	laboratory	Algae, cyanobacteria & macrophytes
EPA OPPTS 850.4400	2012 (EPA 712-C-008)	Aquatic Plant Toxicity Test using Lemna spp. Tiers I & II	laboratory	Algae, cyanobacteria & macrophytes
EPA OPPTS 850.4450	2012 (EPA 712-C-007)	Aquatic Plants Field Study	field	Algae, cyanobacteria & macrophytes
EPA OPPTS 850.5400	1996 (EPA 712-C-96-164)	Algal Toxicity, Tiers I&II	laboratory	Algae, cyanobacteria & macrophytes
EPA OPPTS 885.4300	1996 (EPA 712-C-96-335)	Nontarget Plant Studies, Tier I	laboratory	Algae, cyanobacteria & macrophytes
EPS1/RM/25	2007	Growth Inhibiton test using a freswater alga	laboratory	Algae, cyanobacteria & macrophytes
EPS1/RM/37	2007	Test for Measuring the Inhibition of Growth using freshwater Macrophyte, Lemna minor	laboratory	Algae, cyanobacteria & macrophytes
EU Method C.03	1992	Algal Inhibition test	laboratory	Algae, cyanobacteria & macrophytes
ISO 14442	2006	Guidelines for algal growth inhibition tests with poorly soluble materials, volatile compounds, metals and wastewater	laboratory	Algae, cyanobacteria & macrophytes
ISO 16191	2013	Determination of hte toxic effect of sediment on the growth behaviour of Myriophyllum aquaticum	laboratory	Algae, cyanobacteria & macrophytes
ISO 20079	2005	Determination of the toxic effect of water constituents and waste water on duckweed (Lemna minor) - Duckweed growth inhibition test	laboratory	Algae, cyanobacteria & macrophytes
ISO 20227	2017	Determination of the growth inhibition effects of waste waters, natural waters and chemicals on the duckweed Spirodela polyrhiza -- Method using a stock culture independent microbiotest	laboratory	Algae, cyanobacteria & macrophytes
ISO 8692	2012	Fresh water algal growth inhibition test with unicellar green algae	laboratory	Algae, cyanobacteria & macrophytes
JMAFF 2-7-7	2005	Algae growth inhibition studies	laboratory	Algae, cyanobacteria & macrophytes
OECD 201	2011	Freshwater Alga and Cyanobacteria, Growth Inhibition Test	laboratory	Algae, cyanobacteria & macrophytes
OECD 221	2006	Lemna sp. Growth Inhibition test	laboratory	Algae, cyanobacteria & macrophytes
OECD 238	2014	Sediment-Free Myriophyllum spicatum Toxicity Test	laboratory	Algae, cyanobacteria & macrophytes
OECD 239	2014	Water-Sediment Myriophyllum spicatum Toxicity Test	laboratory	Algae, cyanobacteria & macrophytes
EPA 821-R-01-013 Method 1000.0	2002	Short-term Methods for Estimating the Chronic Toxicity of Effluents and Receiving Waters to Freshwater Organisms	laboratory	Algae, cyanobacteria & macrophytes, Crustacean, Fish
ASTM E 1366-02	2002	Standardized Aquatic Microcosms: Fresh Water	microcosms laboratory	Algae, cyanobacteria & macrophytes, Rotifers, Crustacean, Others
EPA OPPTS 850.1900	1996 (EPA 712-C-96-134)	Generic Freshwater Microcosm Test, Laboratory	microcosms laboratory	Algae, cyanobacteria & macrophytes, Rotifers, Crustacean, Others
ASTM E 1439-98	1998 reapproved 2004	Conducting the Frog Embryo Teratogenesis Assay-Xenopus (FETAX)	laboratory	Amphibia
ASTM E 2591-07	2007	Guide for Conducting Whole Sediment Toxicity Tests with Amphibians	laboratory	Amphibia
EPA OPPTS 850.1800	1996 (EPA 712-C-96-132)	Tadpole/Sediment Subchronic Toxicity Test	laboratory	Amphibia
EPA OPPTS 890.1100	2009 (EPA 740-C-09-002)	Amphibian Metamorphosis	laboratory	Amphibia
OECD 231	2009	Amphibian Metamorphosis Assay	laboratory	Amphibia
ASTM E 1192-97	1997 reapproved 2003	Conducting Acute Toxicity Tests on Aqueous Ambient Samples and Effluents with Fishes, Macroinvertebrates, and Amphibians	laboratory	Amphibia, Molluscs, Crustacean, Insects, Sediment-dwelling, Fish
ASTM E 729-96	2002	Conducting Acute Toxicity Tests on Test Materials with Fishes, Macroinvertebrates, and Amphibians	laboratory	Amphibia, Molluscs, Crustacean, Insects, Sediment-dwelling, Fish
ASTM E 1625-94	1994 (reapproved 2001)	Standard Test Method for Determining Biodegradability of Organic Chemicals in Semi-Continuous Activated Sludge (SCAS)	laboratory	Bacteria and microorganisms
DIN 38412 Part 08	1991	Pseudomonas Zellvermehrungs-Hemmtest	laboratory	Bacteria and microorganisms
DIN 38412 Part 27	1992	Bestimmung der Hemmwirkung von Abwasser auf den Sauerstoffverbrauch von Pseudomonas putida (Pseudomonas-Sauerstoffverbrauchshemmtest)	laboratory	Bacteria and microorganisms
DIN 38412 Part 37	1999-04	Bestimmung der Hemmwirkung von Wasser auf das Wachstum von Bakterien (Photobacterium phosphoreum; Zellvermehrungs-Hemmtest)	laboratory	Bacteria and microorganisms
EPA OPPTS 850.6800	1996 (EPA 712-C-96-168)	Modified Activated Sludge, Respiration Inhibition Test for Sapringly Soluble Chemicals	laboratory	Bacteria and microorganisms
EU Method C.11	1988	Biodegradation: Activated Sludge Respiration Inhibition Test	laboratory	Bacteria and microorganisms
ISO 10712	1995	Pseudomonas putida growth inhibition test (Pseudomonas cell multiplication inhibition test)	laboratory	Bacteria and microorganisms
ISO 11350	2012	Determination of the genotoxicity of water and wasterwater – Salmonella/microsome fluctuation test (Ames fluctuation test)	laboratory	Bacteria and microorganisms
ISO 13829	2000	Determination of the genotoxicity of water and waster water using the umu-test	laboratory	Bacteria and microorganisms
ISO 15522	1999	Determination of the inhibitory effect of water constituents on the growth of activated sludge microorganisms	laboratory	Bacteria and microorganisms
ISO 8192	2007	Test for inhibition of oxygen consumption by activated sludge for carbonaceous and ammonium oxidation	laboratory	Bacteria and microorganisms
ISO 9509	2006	Toxicity test for assessing the inhibition of nitrification of activated sludge microorganisms	laboratory	Bacteria and microorganisms
ISO 9887	1992	Evaluation of the aerobic biodegradability of organic compounds in an aqueous medium -- Semi-continuous activated sludge method (SCAS)	laboratory	Bacteria and microorganisms
OECD 209	2010	Activated Sludge, Respiration Inhibition Test (Carbon and Ammonium Oxidation)	laboratory	Bacteria and microorganisms
OECD 224	2007	Determination of the Inhibition of the Activity of Anaerobic Bacteria	laboratory	Bacteria and microorganisms
40CRF795.120	2003	Gammarid Acute Toxicity Test	laboratory	Crustacean
40CRF797.1300	2003	Daphnid acute toxicity test	laboratory	Crustacean
40CRF797.1330	2003	Daphnid chronic Toxicity Test	laboratory	Crustacean
ASTM E 1193-97	1997 reapproved 2004	Conducting Daphnia magna Life-Cycle Toxicity Tests	laboratory	Crustacean
ASTM E 1295-01	2001	Conducting Three-Brood, Renewal Toxicity Tests with Cariodaphnia dubia	laboratory	Crustacean
DIN 38412 Part 11	1982	Bestimmung der Wirkung von Wasserinhaltsstoffen auf Kleinkrebse (Daphnien-Kurzzeittest)	laboratory	Crustacean
DIN 38412 Part 30	1989	Determination of the non-acute-poisonous effect of waste water to Daphnia by dulition limits	laboratory	Crustacean
EPA OPPTS 850.1010	1996 (EPA 712-C-96-114)	Aquatic Invertebrate Acute Toxicity Test, Freshwater Daphnids	laboratory	Crustacean
EPA OPPTS 850.1020	1996 (EPA 712-C-96-130)	Gammarid Acute Toxicity Test	laboratory	Crustacean
EPA OPPTS 850.1300	1996 (EPA 712-C-96-120)	Daphnid Chronic Toxicity Test	laboratory	Crustacean
EPS1/RM/11	1990 amendments 1996	Acute Lethality Test using Daphnia spp.	laboratory	Crustacean
EPS1/RM/14	2000	Reference Method for Determining Acute Lethality of Effluents to Daphnia magna	laboratory	Crustacean
EPS1/RM/21	2007	Test of Reproduction and Survival using the Cladoceran Cariodaphnia dubia	laboratory	Crustacean
EPS1/RM/33	1997	Test for Survival and Growth in Sediment using the freshwater amphipod Hyalella azteca	laboratory	Crustacean
EU Method C.02	1992	Acute Toxicity for Daphnia	laboratory	Crustacean
EU Method C.20	2001	Daphnia magna Reproduction Test	laboratory	Crustacean
ISO 10706	2000	Determination of long term toxicity of substances to Daphnia magna Straus (Cladocera, Crustacea)	laboratory	Crustacean
ISO 14280	2011	Determination of the acute toxicity to Thamnocephalus platyurus (Crustacea, Anostraca)	laboratory	Crustacean
ISO 14371	2012	Determination of fresh sediment toxicitx to Heterocypris incongruens (Crustacea, Ostracoda)	laboratory	Crustacean
ISO 16303	2013	Determination of toxicity of freshwater sediment using Hyalella azteca	laboratory	Crustacean
ISO 20665	2008	Determination of chronic toxicity to Ceriodaphnia dubia	laboratory	Crustacean
ISO 6341	2012	Determination of the inhibition of the mobility of Daphnia magna Straus (Cladocera, Crustacea) – Acute toxicity test	laboratory	Crustacean
JMAFF 2-7-2-1	2005	Daphnia spp acute immobilization studies	laboratory	Crustacean
JMAFF 2-7-2-2	2005	Daphnia spp (adult daphnids) acute immobilization studies	laboratory	Crustacean
JMAFF 2-7-2-3	2005	Daphnia spp reproducton toxicity studies	laboratory	Crustacean
JMAFF 2-7-4	2005	Freshwater shrimp acute toxicity studies	laboratory	Crustacean
JMAFF 2-7-5	2005	Gammarid Acute Toxicity studies	laboratory	Crustacean
MAFF-Microbial 2	1997	Toxicity study on freshwater invertebrates	laboratory	Crustacean
OECD 202	2004	Daphnia sp. Acute Immobilisation Test	laboratory	Crustacean
OECD 211	2012	Daphnia magna Reproduction Test	laboratory	Crustacean
EPA 821-R-02-012 (Method 2002.0)	2002	Acute test with Ceriodaphnia dubia	laboratory	Crustacean, Fish
FIFRA §72-4 A	1982	Fish early life-stage and aquatic invertebrates life-cycle studies	laboratory	Crustacean, Fish
JMAFF 2-7-3	2005	Fish acute toxicity/ Daphnia spp acute immobilization mitigated by Humic acid Studies	laboratory	Crustacean, Fish
EPA OPPTS 850.1735	1996 (EPA 712-C-96-354)	Whole Sediment Acute Toxicity of Invertebrates, freshwater	laboratory	Crustacean, Insects
EPA OPPTS 885.4650	1996 (EPA 712-C-96-343)	Aquatic Invertebrate Range Testing, Tier III	laboratory	Crustacean, Insects
FIFRA §72-2	1982	Acute toxicity test for freshwateraquatic invertebrates	laboratory	Crustacean, Insects
40CRF797.1400	2003	Fish acute toxicitiy test	laboratory	Fish
40CRF797.1600	2003	Fish early life stage toxicity test	laboratory	Fish
ASTM E 1022-94	1994 reapproved 2002	Conducting Bioconcentration Tests with Fishes and Saltwater Bivalve Mollusks	laboratory	Fish
ASTM E 1241-98	1998 reapproved 2004	Conducting Early Life-Stage Toxicity Tests with Fishes	laboratory	Fish
ASTM E 1768-95	1995 reapproved 2003	Ventilatory Behavioral Toxicology Testing of Freshwater Fish	laboratory	Fish
DIN 38412 Part 15	1982	Determination of the effect of substances in water on fish	laboratory	Fish
DIN 38412 Part 31	1989	Determination of the non-acute-poisonous effect of wast water to fish by dilution limits	laboratory	Fish
DIN 38415-6	2003	Determination of the non-acute-poisonous effect of wast water to fish eggs by dilution water	laboratory	Fish
EPA OPPTS 850.1075	1996 (EPA 712-C-96-118)	Fish Acute Toxicity Test, Freshwater and Marine	laboratory	Fish
EPA OPPTS 850.1085	1996 (EPA 712-C-96-117)	Fish Acute Toxicity Test mitigated by humic acid	laboratory	Fish
EPA OPPTS 850.1400	1996 (EPA 712-C-96-121)	Fish Early-life Stage Toxicity Test	laboratory	Fish
EPA OPPTS 850.1500	1996 (EPA 712-C-96-122)	Fish Life Cycle Toxicity	laboratory	Fish
EPA OPPTS 850.1730	1996 (EPA 712-C-96-129)	Fish BCF	laboratory	Fish
EPA OPPTS 885.4200	1996 (EPA 712-C-96-332)	Freshwater Fish Testing, Tier I	laboratory	Fish
EPA OPPTS 885.4700	1996 (EPA 712-C-96-344)	Fish Life Cycle Studies, Tier III	laboratory	Fish
EPA OPPTS 890.1350	2009 (EPA 740-C-09-007)	Fish Short-Term Reproduction Assay	laboratory	Fish
EPS1/RM/09	1990 amendments 2007	Acute Lethality Test using rainbow Trout	laboratory	Fish
EPS1/RM/13	2000 amendments 2007	Reference Method for determining acute lethality of Effluents to Rainbow Trout	laboratory	Fish
EPS1/RM/22	2011	Test of Larval Growth and Survival Using Fathead Minnows	laboratory	Fish
EPS1/RM/28 (E)	1998	Toxicity tests using earl life stages of Salmonid Fish (Rainbow trout)	laboratory	Fish
EU Method C.01	1992	Acute Toxicity for Fish	laboratory	Fish
EU Method C.13	1998	Bioconcentration: flow-through fish test	laboratory	Fish
EU Method C.14	2001	Fish Juvenile Growth Test	laboratory	Fish
EU Method C.15	2001	Fish, Short-term Toxicity Test on Embryo and Sac-Fry Stages	laboratory	Fish
FIFRA §72-1	1982	Acute toxicity test for freshwater fish	laboratory	Fish
FIFRA §72-5	1982	Life-cycle tests of fish	laboratory	Fish
ISO 10229	1994	Determination of the prolonged toxicity of substances to freshwater fish - Method for evaluating the effects of substances on the growth rate of rainbow trout	laboratory	Fish
ISO 12890	1999	Determination of toxicity to embryos and larvae of freshwater fish – Semi-static method	laboratory	Fish
ISO 15088	2007	Determination of the acute toxicity of waste water to zebrafish eggs (Danio rerio)	laboratory	Fish
ISO 7346-1	1996	Determination of the Acute Lethal Toxicity of Substances to a Freshwater Fish [Brachydanio rerio Hamilton-Buchanan (Teleostei, Cyprinidae)] - Part 1: Static Method	laboratory	Fish
ISO 7346-2	1996	Determination of the Acute Lethal Toxicity of Substances to a Freshwater Fish [Brachydanio rerio Hamilton-Buchanan (Teleostei, Cyprinidae)] - Part 2: Semi-static method	laboratory	Fish
ISO 7346-3	1996	Determination of the Acute Lethal Toxicity of Substances to a Freshwater Fish [Brachydanio rerio Hamilton-Buchanan (Teleostei, Cyprinidae)] - Part 3: Flow-through method	laboratory	Fish
JMAFF 2-7-1-1	2005	Fish acute toxicity studies	laboratory	Fish
JMAFF 2-7-1-2	2005	Fish (larvae) acute toxicity studies	laboratory	Fish
MAFF-Microbial 1	1997	Toxicity study on freshwater fish	laboratory	Fish
MATI_Bioconcentration	1997	Concentration Test of Chemical Substances in Fish	laboratory	Fish
OECD 203	1992	Fish, Acute Toxicity Test	laboratory	Fish
OECD 204 deleted on April 2014	1984	Fish, Prolonged Toxicity Test: 14-day Study	laboratory	Fish
OECD 210	2013	Fish, Early-Life Stage Toxicity Test	laboratory	Fish
OECD 212	1998	Fish, Short-term Toxicity Test on Embryo and Sac-Fry Stages	laboratory	Fish
OECD 215	2000	Fish, Juvenile Growth Test	laboratory	Fish
OECD 229	2012	Fish Short Term Reproduction Assay	laboratory	Fish
OECD 230	2009	21-Day Fish Assay: A Short-Term Screening for Oestrogenic and Androgenic Activity, and Aromatase Inhibition	laboratory	Fish
OECD 234	2011	Fish Sexual Development Test	laboratory	Fish
OECD 236	2013	Fish Embryo Acute Toxicity (FET) Test	laboratory	Fish
OECD 305	2011	Bioaccumulation in Fish: Aqueous and Dietary Exposure	laboratory	Fish
EPA OPPTS 850.1925	1996 (EPA 712-C-96-173)	Site-Specitic Aquatic Microcosm Test, Laboratory	microcosms laboratory	Indigenous fauna and flora both pelagic and benthic community
EPA OPPTS 850.1790	1996 (EPA 712-C-96-313)	Chironomid Sediment Toxicity Test	laboratory	Insects
EPS1/RM/32	1997	Test for Survival and Growth in Sediment using the larvae of freshwater Midges (Chironomus tentans or Chironomus riparius)	laboratory	Insects
JMAFF 2-7-6	2005	Chironomid acute toxicity studies	laboratory	Insects
OECD 218	2004	Sediment-Water Chironomid Toxicity Test Using Spiked Sediment	laboratory	Insects
OECD 219	2004	Sediment-Water Chironomid Toxicity Test Using Spiked Water	laboratory	Insects
OECD 233	2010	Sediment-Water Chironomid Life-Cycle Toxicity Test Using Spiked Water or Spiked Sediment	laboratory	Insects
OECD 235	2011	Chironomus sp. Acute Immobilisation Test	laboratory	Insects
ASTM E 2122-02	2002	Standrad Guide for Conducting In-situ Field Bioassays with Caged Bivalves	field	Molluscs
ASTM E 2455-06	2006	Standard Guide for Conducting Laboratory Toxicity Tests with Freshwater Mussels	laboratory	Molluscs
EPA OPPTS 850.1850	1996 (EPA 712-C-96-133)	Aquatic Food Chain Transfer	laboratory	Molluscs, Crustacean, Insects, Fish
EPA OPPTS 885.4750	1996 (EPA 712-C-96-345)	Aquatic Ecosystem Test	microcosms laboratory	Molluscs, Crustacean, Insects, Fish
FIFRA §72-6 A	1982	Aquatic organism accumulation tests	laboratory	Molluscs, Crustacean, Insects, Fish
FIFRA §72-7	1982	Simulated or actual field testing for aquatic organisms	field	Not defined
EPA OPPTS 850.1950	1996 (EPA 712-C-96-135)	Field testing for Aquatic Organisms	mesocosms	Others
EPA OPPTS 885.4240	1996 (EPA 712-C-96-333)	Freshwater Aquatic Invertebrate Testing, Tier I	laboratory	Others
ASTM E 1440-91	1991 (reapproved 20049	Guide for Acute Toxicity Test with the Rotifer Brachionus	laboratory	Rotifers
ISO 19827	2016	Determination of the acute toxicity to the freshwater rotifer Brachionus calyciflorus	laboratory	Rotifers
ISO 20666	2008	Determination of the chronic toxicity to Brachionus calyciflorus in 48 h	laboratory	Rotifers
ISO 10872	2010	Determination of the toxic effect of sediment and soil samples on growth, fertility and reproduction of Caenorhabditis elegans (Nematoda)	laboratory	Sediment-dwelling
OECD 225	2007	Sediment-Water Lumbriculus Toxicity Test using Spiked sediment	laboratory	Sediment-dwelling
OECD 315	2008	Bioaccumulation in Sediment-dwelling Benthic Oligochaettes	laboratory	Sediment-dwelling
600/R-99/064 – 100.1	2000	Hyalella azteca 10-d Survival and Growth Test for Sediments	laboratory	Sediment-dwelling, Crustacean, Insects
ASTM E 1688-00a	2000	Determination of the Bioaccumulation of Sediment-Associated Contaminants by Benthic Invertebrates	laboratory	Sediment-dwelling, Crustacean, Insects
ASTM E 1706-00	2000	Test Method for Measuring the Toxicity of Sediment-Associated Contaminants with Freshwater Invertebrates	laboratory	Sediment-dwelling, Crustacean, Insects
